# Supplementary material for: β-Cyclocitral-Mediated Metabolic Changes Optimize Growth and Defense Responses in Solanum lycopersicum L.
Source: MDPI journal article supplement (doi:10.3390/metabo13030329), 2023-02-23
Supplement: s1 [file s1]

**Table S1: Compounds identified from control and  $\beta$ CC treated tomato plants by LC-MS/MS.** A total of 57 compounds were identified based on the fragment ion spectra in both positive and negative ionization modes. 1-32 compounds are present in positive mode, and 33-57 in negative mode. RT, retention time; #, metabolites identified by matching the molecular and daughter ions from the predicted spectra from HMDB.

| Sr. No. | Molecular formula                                            | Abundance (%)                                     | Adducts | Mass     | m/z      | RT     | Score | Compound Name               |
|---------|--------------------------------------------------------------|---------------------------------------------------|---------|----------|----------|--------|-------|-----------------------------|
| 1       | C <sub>11</sub> H <sub>10</sub> O <sub>5</sub>               | 149(100), 160(56.02),<br>159(0.46)                | (M+H)+  | 222.0528 | 223      | 10.696 | 79.18 | 2-Succinylbenzoate          |
| 2       | C <sub>16</sub> H <sub>18</sub> O <sub>9</sub>               | 192.05(100), 191.05(41.23),<br>173.04(5.06)       | (M+H)+  | 354.0951 | 355.08   | 10.603 | 84.08 | Chlorogenic acid            |
| 3       | C <sub>9</sub> H <sub>8</sub> O <sub>2</sub>                 | 119.04(78.23), 117.03(54.87),<br>103.05(23.78)    | (M+H)+  | 148.0524 | 149.04   | 14.911 | 89.04 | Cinnamic acid               |
| 4       | C <sub>6</sub> H <sub>8</sub> O <sub>7</sub>                 | 191(100), 175(36.14),<br>170(18.03)               | (M+H)+  | 192.027  | 193.0343 | 6.582  | 96.46 | Citric acid                 |
| 5       | C <sub>6</sub> H <sub>6</sub> O <sub>6</sub>                 | 142.99(82.09), 112(26.78),<br>99.007(1.62)        | (M+H)+  | 174.0164 | 175.0084 | 6.54   | 93.14 | Dehydroascorbic acid        |
| 6       | C <sub>50</sub> H <sub>81</sub> NO <sub>21</sub>             | 1032.541(100), 1030.522(72.19),<br>898.485(25.63) | (M+H)+  | 1031.53  | 1076.532 | 11.903 | 86018 | Dehydrotomatine             |
| 7       | C <sub>8</sub> H <sub>11</sub> NO <sub>2</sub>               | 154.086(100), 154(89.06),<br>153(38.74)           | (M+H)+  | 153.079  | 154.0863 | 4.917  | 76.02 | Dopamine                    |
| 8       | C <sub>6</sub> H <sub>12</sub> O <sub>6</sub>                | 163.06(92.64), 145.04(63.74),<br>127.039(9.34)    | (M+Na)+ | 180.0634 | 198.0972 | 4.509  | 95.59 | Galactose                   |
| 9       | C <sub>4</sub> H <sub>9</sub> NO <sub>2</sub>                | 102.07(100), 87.04(6.47),<br>86.06(2.58)          | (M+H)+  | 103.0633 | 104.07   | 4.427  | 87.57 | $\gamma$ amino butyric acid |
| 10      | C <sub>6</sub> H <sub>12</sub> O <sub>6</sub>                | 118.9(36.4), 113(13.98),<br>89(0.64)              | (M+H)+  | 180.0634 | 179      | 4.549  | 91.68 | Glucose                     |
| 11      | C <sub>6</sub> H <sub>13</sub> O <sub>9</sub> P              | 199(78.02), 138.979(37.51),<br>96.96 (2.78)       | (M+H)+  | 260.0297 | 261.022  | 4.308  | 88.57 | Glucose-6-phosphate         |
| 12      | C <sub>5</sub> H <sub>9</sub> NO <sub>4</sub>                | 130.05(82.63), 102.07(46.32),<br>85.047(2.78)     | (M+H)+  | 147.0532 | 148.06   | 4.438  | 86.84 | Glutamate                   |
| 13      | C <sub>5</sub> H <sub>10</sub> N <sub>2</sub> O <sub>3</sub> | 169.05(100), 130.04(25.33),<br>101.07(17.69)      | (M+H)+  | 146.0691 | 147.06   | 4.346  | 85.26 | Glutamine                   |
| 14      | C <sub>4</sub> H <sub>9</sub> NO <sub>3</sub>                | 119.99(100), 102.04(65.42),<br>74.125(3.74)       | (M+H)+  | 119.0582 | 120.065  | 7.392  | 80.85 | Homoserine                  |
| 15      | C <sub>18</sub> H <sub>32</sub> O <sub>2</sub>               | 281(100), 280(80.14),<br>265(23.87)               | (M+H)+  | 280.2402 | 281.247  | 19.73  | 75.37 | Linoleic acid               |
| 16      | C <sub>6</sub> H <sub>14</sub> N <sub>2</sub> O <sub>2</sub> | 145.1(100), 130.08(3.61),<br>119.08(076)          | (M+H)+  | 146.1055 | 147.11   | 4.023  | 78    | Lysine                      |
| 17      | C <sub>52</sub> H <sub>85</sub> NO <sub>23</sub>             | 1092(100), 1013(56.13),<br>383(17.85)             | (M+H)+  | 1091.551 | 1092     | 4.143  | 18.06 | Lycoperside A               |

| Sr. No. | Molecular formula                                                             | Abundance (%)                                  | Adducts                             | Mass     | m/z      | RT     | Score | Compound Name              |
|---------|-------------------------------------------------------------------------------|------------------------------------------------|-------------------------------------|----------|----------|--------|-------|----------------------------|
| 18      | C <sub>4</sub> H <sub>6</sub> O <sub>5</sub>                                  | 135(100), 117(20.02),<br>89(16.73)             | (M+H)+                              | 134.0215 | 135.0142 | 5.687  | 96.78 | Malic acid <sup>#</sup>    |
| 19      | C <sub>6</sub> H <sub>12</sub> O <sub>6</sub>                                 | 180.19(100), 162(81.02),<br>85.098(24.87)      | (M+H)+                              | 180.0634 | 181.05   | 4.55   | 95.33 | Mannose                    |
| 20      | C <sub>5</sub> H <sub>9</sub> NO <sub>4</sub>                                 | 148.06(100), 106.04(43.12),<br>88.039(2.54)    | (M+H)+                              | 147.0532 | 148.06   | 4.43   | 80.7  | O-acetylserine             |
| 21      | C <sub>9</sub> H <sub>11</sub> NO <sub>2</sub>                                | 165.05(100), 130.96(37.52),<br>119.96(2.74)    | (M+H)+                              | 165.079  | 166.08   | 10.037 | 92.53 | Phenylalanine              |
| 22      | C <sub>3</sub> H <sub>4</sub> O <sub>3</sub>                                  | 41(100), 43(33.33),<br>42(8.41)                | (M+HCOO)<br>(M+CH <sub>3</sub> COO) | 88.06    | 89.0088  | 5.035  | 96.73 | Pyruvic acid               |
| 23      | C <sub>7</sub> H <sub>12</sub> O <sub>6</sub>                                 | 191.3(100), 126.08(23.45),<br>156.9(10.87)     | (M+H)+                              | 192.0634 | 193.0707 | 4.67   | 98.6  | Quinic acid <sup>#</sup>   |
| 24      | C <sub>27</sub> H <sub>30</sub> O <sub>16</sub>                               | 611(100), 610(77.33),<br>303.04(14.52)         | (M+H)+                              | 610.1534 | 611.16   | 11.661 | 81.92 | Rutin                      |
| 25      | C <sub>45</sub> H <sub>73</sub> NO <sub>16</sub>                              | 884.5(100), 413.33(50.14),<br>412.33(49.86)    | (M+H)+<br>(M+Na)+                   | 883.4929 | 884      | 11.47  | 85.25 | Solasonin                  |
| 26      | C <sub>3</sub> H <sub>7</sub> NO <sub>3</sub>                                 | 105.037(100), 88.016(41.23),<br>60.0154(21.87) | (M+H)+                              | 105.0426 | 106.049  | 4.308  | 78.14 | Serine                     |
| 27      | C <sub>4</sub> H <sub>6</sub> O <sub>4</sub>                                  | 116.955(92.14),99.016(26.74),<br>73.114(10.05) | (M+H)+<br>(M+CH <sub>3</sub> COO)   | 118.0266 | 119.019  | 5.484  | 92.91 | Succinic acid <sup>#</sup> |
| 28      | C <sub>12</sub> H <sub>22</sub> O <sub>11</sub>                               | 324.92(100), 162.96(47.31),<br>144.94(8.66)    | (M+H)+<br>(M+HCOO)                  | 342.1162 | 365.1054 | 4.509  | 91    | Sucrose                    |
| 29      | C <sub>4</sub> H <sub>9</sub> NO <sub>3</sub>                                 | 118(100), 102.05(32.47),<br>84.04(1.62)        | (M+H)+                              | 119.0582 | 120.06   | 4.346  | 96.23 | Threonine                  |
| 30      | C <sub>50</sub> H <sub>83</sub> NO <sub>21</sub>                              | 1034.55(100), 1017.54(80.11)<br>1016.54(73.55) | (M+H)+                              | 1033.546 | 1034.553 | 12.108 | 75.96 | Tomatine                   |
| 31      | C <sub>15</sub> H <sub>24</sub> N <sub>2</sub> O <sub>17</sub> P <sub>2</sub> | 566.777(100),565.053(23.84),<br>542.85(1.64)   | (M+H)+                              | 566.055  | 567.047  | 4.1    | 79.51 | UDP- Glucose               |
| 32      | C <sub>5</sub> H <sub>11</sub> NO <sub>2</sub>                                | 117.99(100), 72.146(20.81),<br>73.08(2.64)     | (M+H)+                              | 117.079  | 118.0862 | 6.135  | 79.91 | Valine                     |
| 33      | C <sub>6</sub> H <sub>4</sub> N <sub>2</sub> O <sub>5</sub>                   | 153(100), 123(2.6),<br>137.01(0.52)            | (M-H)-                              | 184.012  | 183      | 18.523 | 76.02 | 2,4-Dinitrophenol          |
| 34      | C <sub>3</sub> H <sub>7</sub> O <sub>7</sub> P                                | 166(100), 96.92(25.12),<br>86.98(2.5)          | (M-H)-                              | 185.9929 | 184.99   | 4.368  | 92.98 | 3-Phosphoglyceric acid     |
| 35      | C <sub>6</sub> H <sub>14</sub> N <sub>4</sub> O <sub>2</sub>                  | 158(100), 157(8.62),<br>116(5.37)              | (M-H)-                              | 174.1117 | 173.11   | 4.104  | 98.74 | Arginine                   |
| 36      | C <sub>6</sub> H <sub>8</sub> O <sub>6</sub>                                  | 147(100), 113.023(27.63),<br>87.007(5.21)      | (M-H)-                              | 176.0321 | 175.0241 | 4.351  | 92.7  | Ascorbic acid              |
| 37      | C <sub>4</sub> H <sub>7</sub> NO <sub>4</sub>                                 | 132.04(100), 116.03(34.78),<br>88.03(9.37)     | (M-H)-                              | 133.0375 | 132.044  | 4.346  | 81.26 | Aspartate                  |

| Sr. No. | Molecular formula                                             | Abundance (%)                                   | Adducts                              | Mass     | m/z      | RT     | Score | Compound Name           |
|---------|---------------------------------------------------------------|-------------------------------------------------|--------------------------------------|----------|----------|--------|-------|-------------------------|
| 38      | C <sub>7</sub> H <sub>6</sub> O <sub>2</sub>                  | 123.44(100), 105.045(26.87),<br>95.049(16.32)   | (M-H)-                               | 122.0368 | 121.0442 | 13.444 | 85.43 | Benzoic acid            |
| 39      | C <sub>9</sub> H <sub>8</sub> O <sub>4</sub>                  | 163.03(100), 145.02(34.12),<br>135.04(29.64)    | (M-HCOO)-                            | 180.0423 | 179.04   | 10.608 | 85.38 | Caffeic acid            |
| 40      | C <sub>5</sub> H <sub>8</sub> O <sub>5</sub>                  | 147.028(100), 129.018(24.85),<br>87(11.84)      | (M-H)-<br>(M+CH <sub>3</sub> COO)-   | 148.0372 | 147.028  | 7.72   | 92.8  | Citramalic acid         |
| 41      | C <sub>9</sub> H <sub>8</sub> O <sub>3</sub>                  | 163(100), 146(52.63),<br>123(21.79)             | (M-H)-                               | 164.0473 | 163.0546 | 13.36  | 84.85 | Coumaric acid           |
| 42      | C <sub>10</sub> H <sub>10</sub> O <sub>4</sub>                | 178.026(100), 175.04(84.25),<br>149.059(52.17)  | (M-H)-<br>(M+HCOO)-                  | 194.0579 | 193.05   | 14.911 | 87.68 | Ferulic acid            |
| 43      | C <sub>4</sub> H <sub>4</sub> O <sub>4</sub>                  | 115(100), 114.9(8.15),<br>113.173(0.67)         | (M-H)-<br>(M+HCOO)-                  | 116.011  | 115.0024 | 5.036  | 85.63 | Fumaric acid            |
| 44      | C <sub>6</sub> H <sub>10</sub> O <sub>7</sub>                 | 175.1(100), 131.1(24.81),<br>113.1(10.67)       | (M-H)-<br>(M+CH <sub>3</sub> COO)-   | 194.0427 | 193.035  | 4.467  | 92.23 | Glucuronic acid         |
| 45      | C <sub>5</sub> H <sub>8</sub> O <sub>4</sub>                  | 130.936(100), 112.97(54.97),<br>87.075(22.56)   | (M+HCOO)<br>(M+CH <sub>3</sub> COO)- | 132.0423 | 131.03   | 4.673  | 99.02 | Glutaric acid           |
| 46      | C <sub>6</sub> H <sub>9</sub> N <sub>3</sub> O <sub>2</sub>   | 154.903(100), 136.9(63.79),<br>135.9(14.23)     | (M-H)-                               | 155.0695 | 154.0622 | 4.346  | 85.13 | Histidine               |
| 47      | C <sub>5</sub> H <sub>9</sub> NO <sub>3</sub>                 | 130.073(100), 132.066(96.42),<br>114.055(20.14) | (M-H)-                               | 131.0582 | 130.0655 | 7.353  | 80.85 | Hydroxyproline          |
| 48      | C <sub>10</sub> H <sub>10</sub> O <sub>4</sub>                | 193.16(100), 178.153(54.36),<br>134.183(8.74)   | (M-H)-                               | 194.0579 | 193.0506 | 14.993 | 84.28 | Isoferulic acid         |
| 49      | C <sub>6</sub> H <sub>13</sub> NO <sub>2</sub>                | 130.1(100), 129.3(23.64),<br>86.09(2.69)        | (M-Na)-                              | 131.0946 | 130.1    | 4.998  | 75.23 | Isoleucine              |
| 50      | C <sub>5</sub> H <sub>6</sub> O <sub>4</sub>                  | 129(100), 113(23.14),<br>99(0.36)               | (M-HCOO)<br>(M-CH <sub>3</sub> COO)- | 130.0266 | 129.0339 | 4.958  | 89.8  | Itaconic acid           |
| 51      | C <sub>6</sub> H <sub>13</sub> NO <sub>2</sub>                | 130.506(100), 86.087(24.87),<br>80.049(1.98)    | (M-Na)-                              | 131.0946 | 130.101  | 7.957  | 75.12 | Leucine                 |
| 52      | C <sub>6</sub> H <sub>5</sub> NO <sub>2</sub>                 | 122.05(100), 106.01(6.87),<br>80(2.14)          | (M-H)-<br>(M+HCOO)-                  | 123.032  | 122.03   | 15.62  | 85.89 | Nicotinic acid          |
| 53      | C <sub>7</sub> H <sub>6</sub> O <sub>3</sub>                  | 137.02(100), 98.462(76.84),<br>112.03(49.54)    | (M-H)-<br>(M+HCOO)-                  | 138.12   | 137.026  | 15.35  | 96.58 | Salicyclic acid         |
| 54      | C <sub>27</sub> H <sub>43</sub> NO <sub>2</sub>               | 412.33(100), 396.324(87.21),<br>157.099(30.77)  | (M-H)-                               | 413.3294 | 412.33   | 18.689 | 77.22 | Solasodine <sup>#</sup> |
| 55      | C <sub>7</sub> H <sub>10</sub> O <sub>5</sub>                 | 173(100), 157(63.47),<br>129(21.49)             | (M+HCOO)<br>(M+CH <sub>3</sub> COO)- | 174.0528 | 173.06   | 11.05  | 77.55 | Shikimic acid           |
| 56      | C <sub>11</sub> H <sub>12</sub> N <sub>2</sub> O <sub>2</sub> | 203.89(100), 187.87(54.12),<br>145.92(8.74)     | (M-H)-<br>(M+HCOO)-                  | 204.0899 | 203.09   | 10.809 | 92.89 | Tryptophan              |
| 57      | C <sub>9</sub> H <sub>11</sub> NO <sub>3</sub>                | 180.08(100), 165.05(23.74),<br>136.07(7.64)     | (M-H)-                               | 181.0739 | 180.08   | 18.64  | 88.7  | Tyrosine                |

**Table S2: Statistical analysis of the levels of discriminant metabolites identified early after  $\beta$ CC treatment.** The normalized peak area of the upregulated discriminant metabolites identified after 0, 30, 60, 90, 180, and 240 minutes after  $\beta$ CC treatment was compared with that of control plants. Mean normalized peak area ( $\pm$  SE) was analyzed from four replicate plants by one-way ANOVA and Fisher's LSD *post hoc* test. Significant difference is determined at  $p \leq 0.05$ . ND, not detected.

| Sr. No.                        | Metabolite name | F value<br>( $F_{12,39}$ ) | 0 min                                                               | 30 min                                                              | Mean ( $\pm$ SE); <i>p</i> - value                                  |                                                                     |                                                                       |                                                                     |
|--------------------------------|-----------------|----------------------------|---------------------------------------------------------------------|---------------------------------------------------------------------|---------------------------------------------------------------------|---------------------------------------------------------------------|-----------------------------------------------------------------------|---------------------------------------------------------------------|
|                                |                 |                            |                                                                     |                                                                     | 60 min                                                              | 90 min                                                              | 180 min                                                               | 240 min                                                             |
| <b>Upregulated metabolites</b> |                 |                            |                                                                     |                                                                     |                                                                     |                                                                     |                                                                       |                                                                     |
| 1.                             | Aspartate       | 2.039                      | C= 0.045<br>( $\pm 0.003$ )<br>B= 0.051<br>( $\pm 0.005$ )<br>0.767 | C= 0.028<br>( $\pm 0.016$ )<br>B= 0.052<br>( $\pm 0.018$ )<br>0.158 | C= 0.030<br>( $\pm 0.018$ )<br>B= 0.070<br>( $\pm 0.009$ )<br>0.026 | C= 0.014<br>( $\pm 0.005$ )<br>B= 0.044<br>( $\pm 0.011$ )<br>0.087 | C= 0.011<br>( $\pm 0.011$ )<br>B= 0.038<br>( $\pm 0.005$ )<br>0.122   | C= 0.023<br>( $\pm 0.013$ )<br>B= 0.046<br>( $\pm 0.015$ )<br>0.191 |
| 2.                             | Leucine         | 9.665                      | C= ND<br>B= 0.008<br>( $\pm 0.001$ )<br>0.0042                      | C= ND<br>B= 0.010<br>( $\pm 0.002$ )<br>0.0005                      | C= ND<br>B= 0.010<br>( $\pm 0.002$ )<br>0.0002                      | C= ND<br>B= 0.008<br>( $\pm 0.001$ )<br>0.004                       | C= ND<br>B= 0.010<br>( $\pm 0.002$ )<br>0.0004                        | C= ND<br>B= 0.015<br>( $\pm 0.005$ )<br><0.0001                     |
| 3.                             | Glutamate       | 2.059                      | C= 0.137<br>( $\pm 0.047$ )<br>B= 0.171<br>( $\pm 0.011$ )<br>0.457 | C= 0.165<br>( $\pm 0.058$ )<br>B= 0.205<br>( $\pm 0.017$ )<br>0.396 | C= 0.154<br>( $\pm 0.051$ )<br>B= 0.233<br>( $\pm 0.023$ )<br>0.095 | C= 0.107<br>( $\pm 0.018$ )<br>B= 0.237<br>( $\pm 0.040$ )<br>0.010 | C= 0.185<br>( $\pm 0.019$ )<br>B= 0.247<br>( $\pm 0.032$ )<br>0.185   | C= 0.164<br>( $\pm 0.013$ )<br>B= 0.254<br>( $\pm 0.014$ )<br>0.061 |
| 4.                             | Tryptophan      | 12.388                     | C= ND<br>B= 0.103<br>( $\pm 0.017$ )<br><0.0001                     | C= ND<br>B= 0.122<br>( $\pm 0.012$ )<br><0.0001                     | C= ND<br>B= 0.077<br>( $\pm 0.030$ )<br>0.0003                      | C= ND<br>B= 0.080<br>( $\pm 0.008$ )<br>0.0002                      | C= ND<br>B= 0.067<br>( $\pm 0.020$ )<br>0.0014                        | C= ND<br>B= 0.081<br>( $\pm 0.021$ )<br>0.0002                      |
| 5.                             | Homoserine      | 49.842                     | C= ND<br>B= 0.034<br>( $\pm 0.004$ )<br><0.0001                     | C= ND<br>B= 0.028<br>( $\pm 0.003$ )<br><0.0001                     | C= ND<br>B= 0.029<br>( $\pm 0.003$ )<br><0.0001                     | C= ND<br>B= 0.039<br>( $\pm 0.001$ )<br><0.0001                     | C= ND<br>B= 0.045<br>( $\pm 0.006$ )<br><0.0001                       | C= ND<br>B= 0.026<br>( $\pm 0.004$ )<br><0.0001                     |
| 6.                             | O-acetylserine  | 45.476                     | C= ND<br>B= 0.171<br>( $\pm 0.011$ )<br><0.0001                     | C= ND<br>B= 0.205<br>( $\pm 0.017$ )<br><0.0001                     | C= ND<br>B= 0.233<br>( $\pm 0.023$ )<br><0.0001                     | C= ND<br>B= 0.237<br>( $\pm 0.040$ )<br><0.0001                     | C= ND<br>B= 0.247<br>( $\pm 0.032$ )<br><0.0001                       | C= ND<br>B= 0.254<br>( $\pm 0.014$ )<br><0.0001                     |
| 7.                             | Shikimate       | 7.444                      | C= ND<br>B= 0.015<br>( $\pm 0.005$ )<br>0.0221                      | C= ND<br>B= 0.037<br>( $\pm 0.005$ )<br><0.0001                     | C= ND<br>B= 0.015<br>( $\pm 0.006$ )<br>0.022                       | C= ND<br>B= 0.020<br>( $\pm 0.007$ )<br>0.022                       | C= ND<br>B= 0.016<br>( $\pm 0.007$ )<br>0.0122                        | C= ND<br>B= 0.018<br>( $\pm 0.007$ )<br>0.005                       |
| 8.                             | Coumaric acid   | 4.166                      | C= 0.002<br>( $\pm 0.001$ )<br>B= 0.009<br>( $\pm 0.005$ )<br>0.186 | C= 0.005<br>( $\pm 0.002$ )<br>B= 0.011<br>( $\pm 0.006$ )<br>0.243 | C= 0.005<br>( $\pm 0.003$ )<br>B= 0.017<br>( $\pm 0.003$ )<br>0.024 | C= 0.003<br>( $\pm 0.001$ )<br>B= 0.001<br>( $\pm 0.001$ )<br>0.74  | C= 0.002<br>( $\pm 0.001$ )<br>B= 0.025<br>( $\pm 0.007$ )<br><0.0001 | C= 0.002<br>( $\pm 0.001$ )<br>B= 0.11<br>( $\pm 0.005$ )<br>0.107  |
| 9.                             | Rutin           | 36.992                     | C= ND                                                                 | C= ND                                                               |

|                                  |                |        |                                                                           |                                                                           |                                                                           |                                                                           |                                                                           |                                                                           |
|----------------------------------|----------------|--------|---------------------------------------------------------------------------|---------------------------------------------------------------------------|---------------------------------------------------------------------------|---------------------------------------------------------------------------|---------------------------------------------------------------------------|---------------------------------------------------------------------------|
|                                  |                |        | B= 1.424<br>(±0.135)<br><0.0001<br>C= ND<br>B= 0.002<br>(±0.002)<br>0.396 | B= 1.656<br>(±0.243)<br><0.0001<br>C= ND<br>B= 0.003<br>(±0.001)<br>0.089 | B= 2.184<br>(±0.322)<br><0.0001<br>C= ND<br>B= 0.003<br>(±0.001)<br>0.132 | B= 1.240<br>(±0.322)<br><0.0001<br>C= ND<br>B= 0.007<br>(±0.003)<br>0.001 | B= 1.045<br>(±0.129)<br><0.0001<br>C= ND<br>B= 0.004<br>(±0.001)<br>0.049 | B= 1.376<br>(±0.143)<br><0.0001<br>C= ND<br>B= 0.004<br>(±0.001)<br>0.057 |
| 10.                              | Salicylic acid | 2.783  |                                                                           |                                                                           |                                                                           |                                                                           |                                                                           |                                                                           |
| 11.                              | UDP-glucose    | 5.999  |                                                                           |                                                                           |                                                                           |                                                                           |                                                                           |                                                                           |
|                                  |                |        | B= 2.457<br>(±0.522)<br>0.007                                             | B= 3.637<br>(±0.833)<br>0.0002                                            | B= 4.006<br>(±1.756)<br><0.0001                                           | B= 0.606<br>(±0.195)<br>0.487                                             | B= 0.662<br>(±0.142)<br>0.448                                             | B= 1.540<br>(±0.002)<br>0.604                                             |
| 12.                              | Galactose      | 16.399 |                                                                           |                                                                           |                                                                           |                                                                           |                                                                           |                                                                           |
|                                  |                |        | C= ND<br>B= 0.142<br>(±0.009)<br><0.0001                                  | C= ND<br>B= 0.086<br>(±0.020)<br>0.0013                                   | C= ND<br>B= 0.130<br>(±0.024)<br><0.0001                                  | C= ND<br>B= 0.171<br>(±0.040)<br><0.0001                                  | C= ND<br>B= 0.131<br>(±0.014)<br><0.0001                                  | C= ND<br>B= 0.123<br>(±0.029)<br><0.0001                                  |
| <b>Downregulated metabolites</b> |                |        |                                                                           |                                                                           |                                                                           |                                                                           |                                                                           |                                                                           |
| 13.                              | Cinnamic acid  | 2.947  | C= 0.007<br>(±0.003)<br>B= ND<br>0.256                                    | C= 0.015<br>(±0.004)<br>B= ND<br>0.0218                                   | C= 0.015<br>(±0.007)<br>B= ND<br>0.026                                    | C= 0.011<br>(±0.004)<br>B= ND<br>0.084                                    | C= 0.021<br>(±0.011)<br>B= ND<br>0.0016                                   | C= 0.008<br>(±0.003)<br>B= ND<br>0.22                                     |
| 14.                              | Linoleic acid  | 10.045 |                                                                           |                                                                           |                                                                           |                                                                           |                                                                           |                                                                           |
|                                  |                |        | C= 0.017<br>(±0.002)<br>B= ND<br><0.0001                                  | C= 0.013<br>(±0.001)<br>B= 0.001<br>(±0.001)<br><0.0001                   | C= 0.006<br>(±0.004)<br>B= 0.005<br>(±0.003)<br>0.533                     | C= 0.004<br>(±0.002)<br>B= 0.004<br>(±0.002)<br>0.79                      | C= 0.010<br>(±0.001)<br>B= ND<br>0.0005                                   | C= 0.002<br>(±0.002)<br>B= ND<br>0.532                                    |
| 15.                              | Nicotinic acid | 7.143  |                                                                           |                                                                           |                                                                           |                                                                           |                                                                           |                                                                           |
|                                  |                |        | C= 0.003<br>(±0.001)<br>B= ND<br>0.019                                    | C= 0.003<br>(±0.001)<br>B= ND<br>0.036                                    | C= 0.001<br>(±0.001)<br>B= ND<br>0.339                                    | C= 0.008<br>(±0.001)<br>B= ND<br><0.0001                                  | C= 0.005<br>(±0.002)<br>B= ND<br>0.0009                                   | C= 0.001<br>(±0.001)<br>B= ND<br>0.437                                    |
| 16.                              | Sucrose        | 11.259 |                                                                           |                                                                           |                                                                           |                                                                           |                                                                           |                                                                           |
|                                  |                |        | C= 0.044<br>(±0.014)<br>B= ND<br>0.017                                    | C= 0.073<br>(±0.006)<br>B= ND<br>0.0002                                   | C= 0.087<br>(±0.013)<br>B= ND<br><0.0001                                  | C= 0.059<br>(±0.019)<br>B= ND<br>0.0019                                   | C= 0.110<br>(±0.025)<br>B= ND<br><0.0001                                  | C= 0.073<br>(±0.022)<br>B= ND<br>0.0002                                   |
