# Supplementary material for: β-Cyclocitral-Mediated Metabolic Changes Optimize Growth and Defense Responses in Solanum lycopersicum L.
Source: MDPI journal article supplement (doi:10.3390/metabo13030329), 2023-02-23
Supplement: s1 [file s1]

**(a) Control 0 minutes**

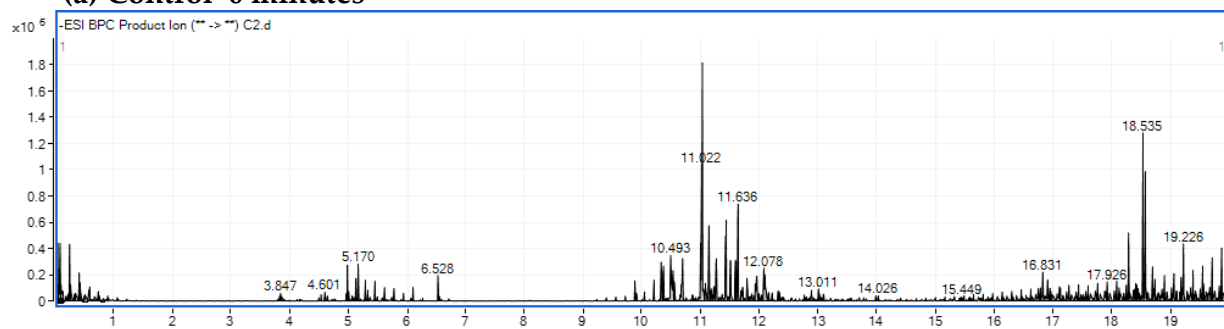

**(b) Control 30 minutes**

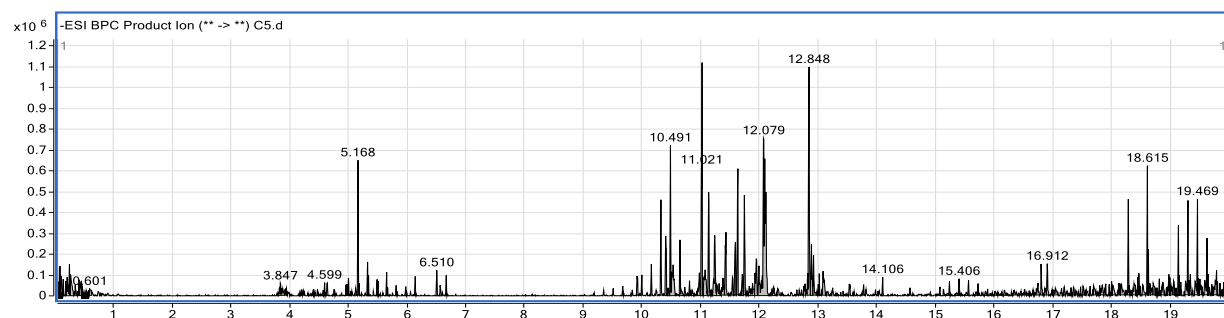

**(c) Control 60 minutes**

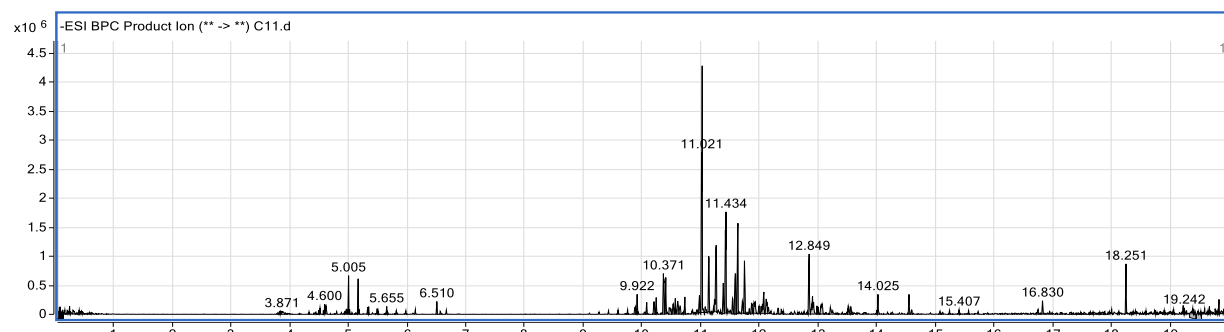

Counts vs. acquisition time (min)

**(d) Control 90minutes**

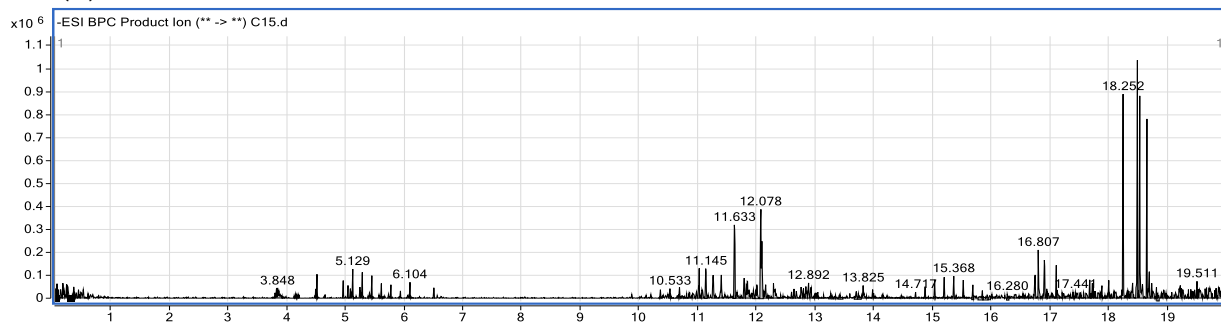

**(e) Control 180minutes**

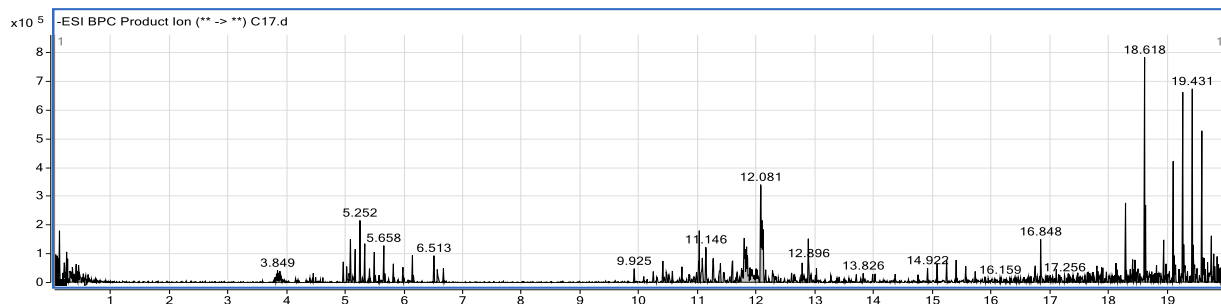

**(f) Control 240minutes**

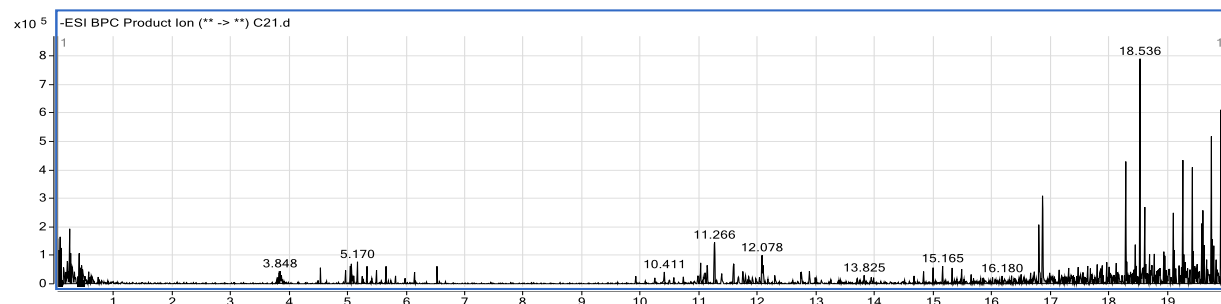

Counts vs. acquisition time (min)

**(g)  $\beta$ CC 0 minutes**

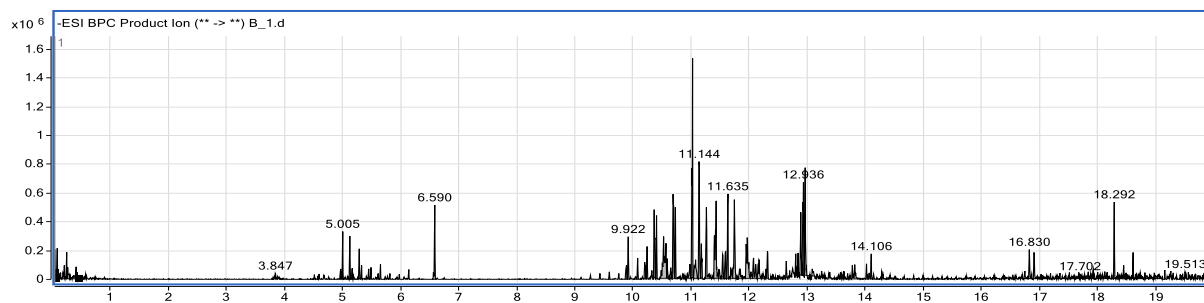

**(h)  $\beta$ CC 30 minutes**

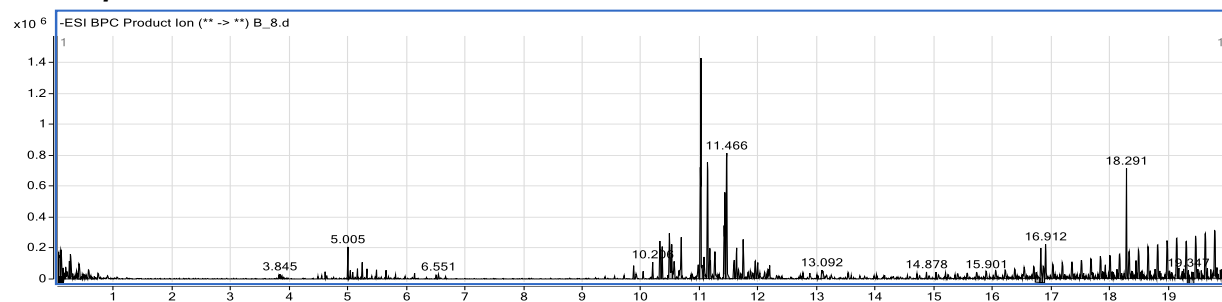

**(i)  $\beta$ CC 60 minutes**

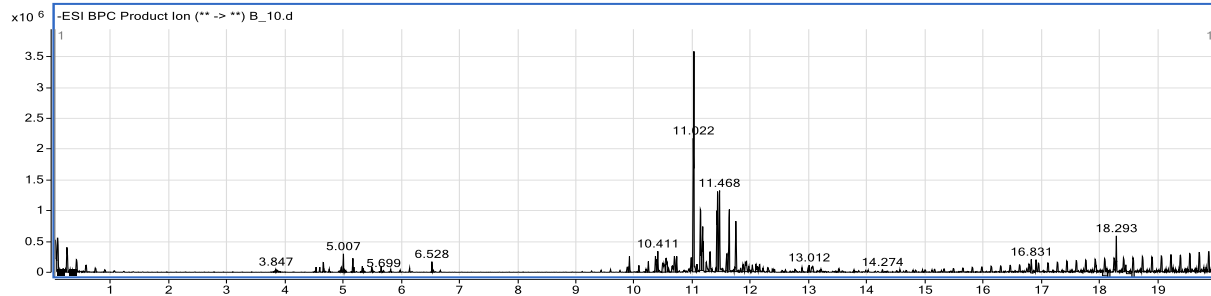

Counts vs. acquisition time (min)

(j)  $\beta$ CC 90minutes

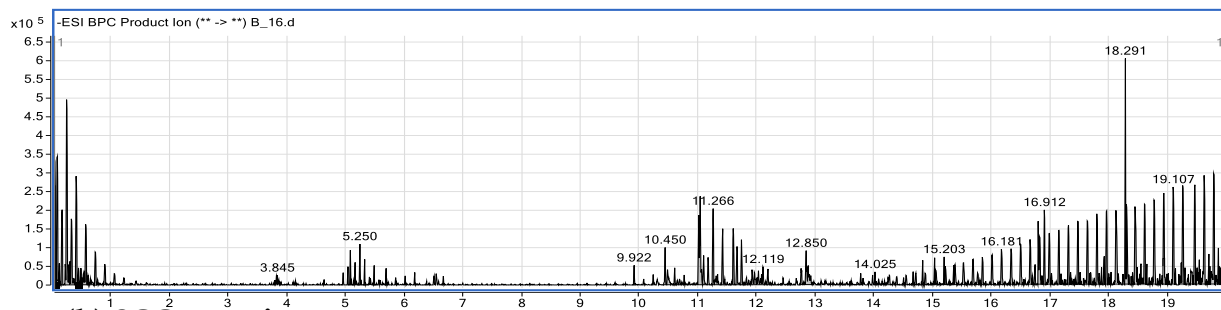

(k)  $\beta$ CC 180minutes

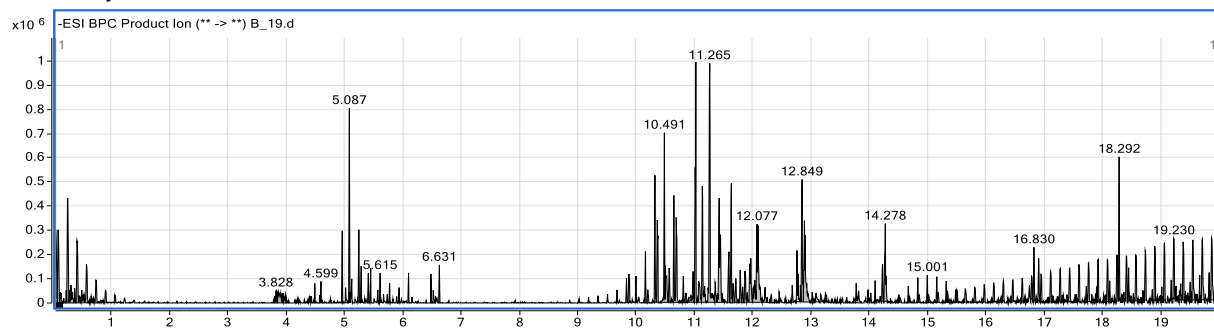

(l)  $\beta$ CC 240minutes

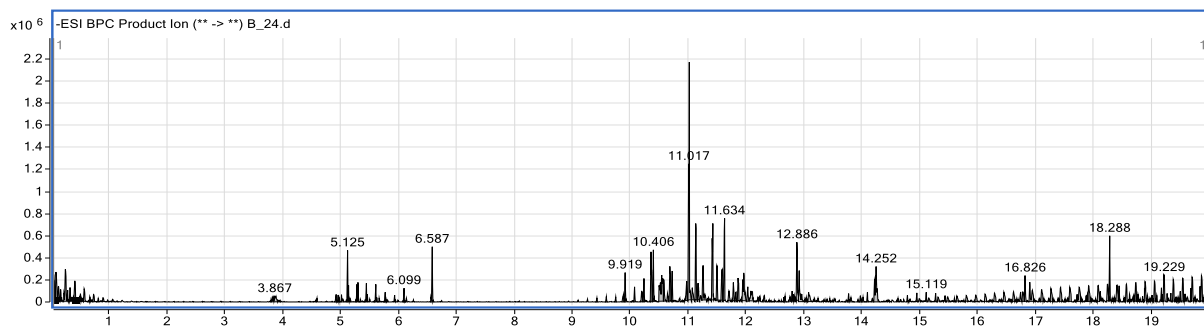

Counts vs. acquisition time (min)

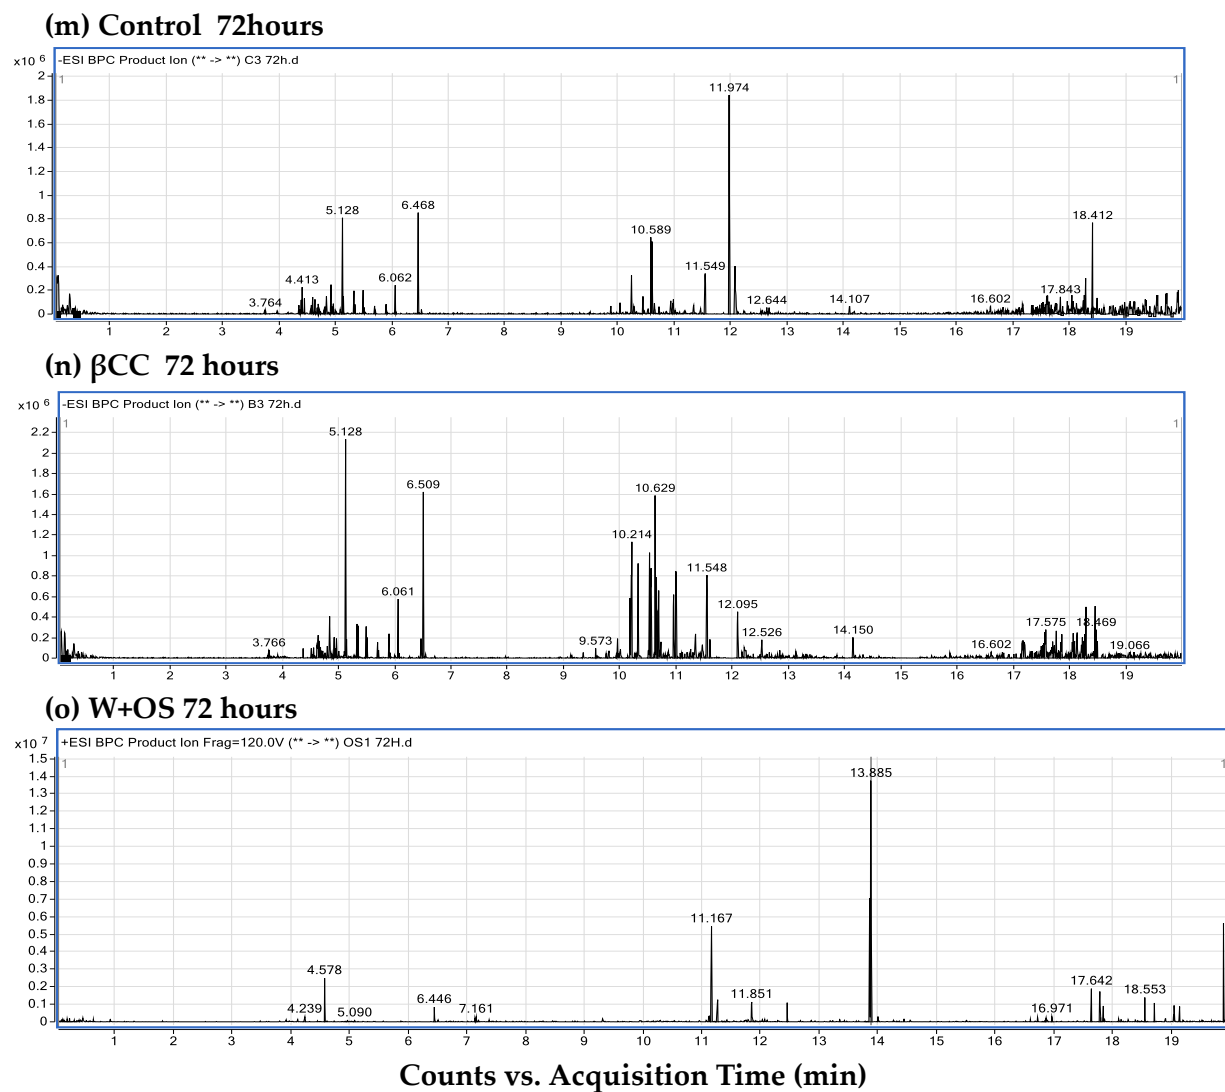

**Figure S1: Representative base peak chromatogram (BPC) from LC-MS analysis of control,  $\beta$ CC-, and simulated herbivory treated samples.**

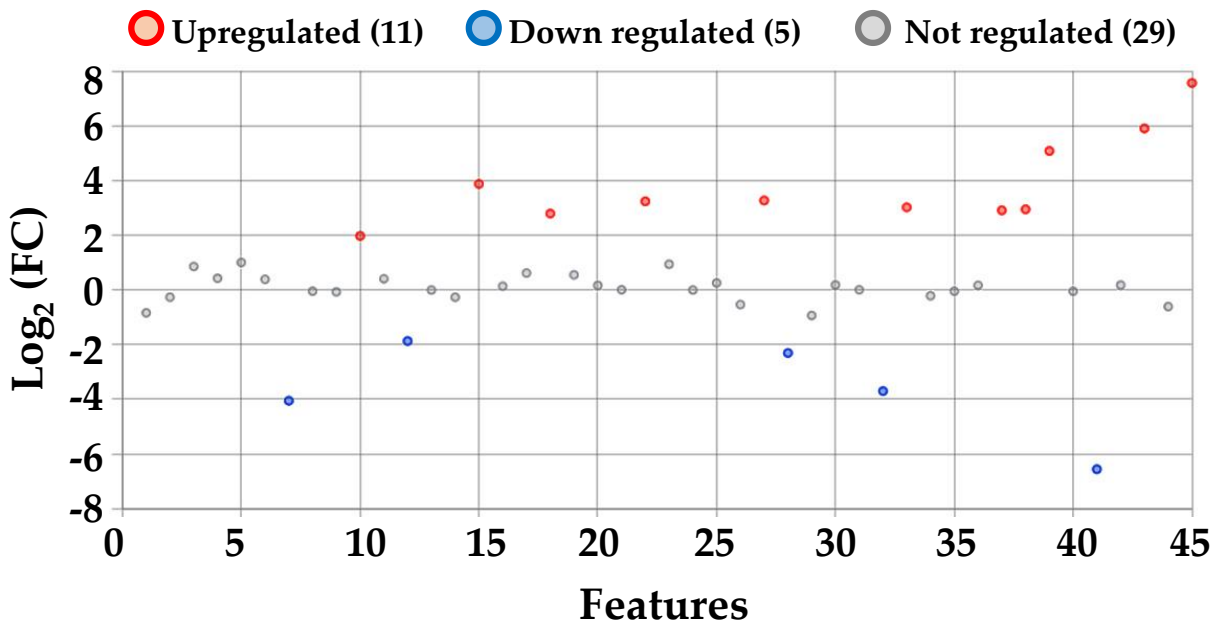

Figure S2: Fold-change analysis of the samples from early time points (0-240 minutes) after  $\beta\text{CC}$  treatment as compared to control plants. Normalized peak area from all the samples were subjected to fold-change analysis where  $-2 \geq \log_2\text{FC} \geq 2$ .

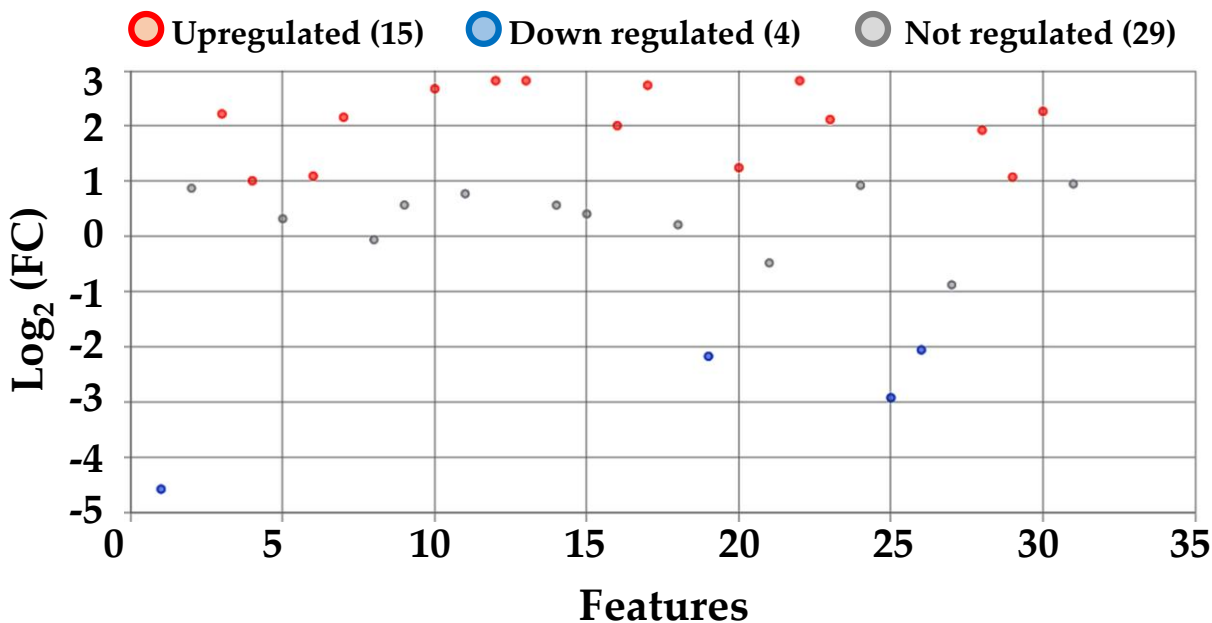

Figure S3: Fold-change analysis of the samples from 72 h after  $\beta\text{CC}$  treated plants as compared to control plants. Normalized peak area from all the samples were subjected to fold-change analysis where  $-2 \geq \log_2\text{FC} \geq 2$ .
